# Supplementary material for: Induced morphology control of Ln–asparagine coordination polymers from the macro to nanoscopic regime in polar solvent–water mixtures
Source: Royal Society of Chemistry journal article supplement (doi:10.1039/c2dt32296j), 2012-10-22
Supplement: c2dt32296j.pdf [file c2dt32296j.pdf]

## Supporting information

### **Induced Morphology Control of Ln-asparagine Coordination Polymers from Macro to Nanoscopic Regime in Polar Solvent/Water Mixtures**

**Ming Yang <sup>a</sup>, Zhurui Shen <sup>a\*</sup>, Tiehong Chen <sup>b</sup>, Huichao Bi <sup>a</sup>, Bin Yang <sup>c</sup>, Wei Xu <sup>a</sup>**

- a. Key Laboratory for Advanced Ceramics and Machining Technology of Ministry of Education, Tianjin University & School of material Science and Engineering, Tianjin University, Tianjin 300072, PR China, E-mail: shenzhurui@tju.edu.cn
- b. Key Laboratory of Advanced Energy Materials Chemistry (MOE), College of Chemistry, Nankai University, Tianjin 300071, PR China
- c. Shenyang Branch, Shimadzu (China) Co., LTD.

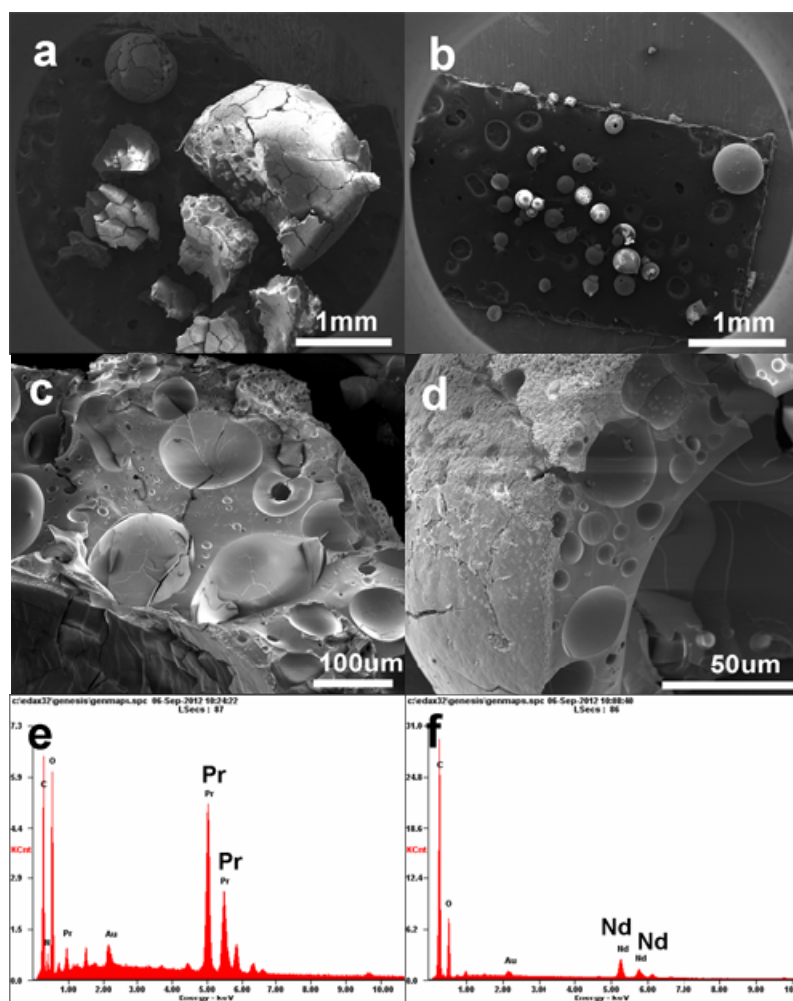

**Figure S1** SEM images and EDX spectra of (a, c, e) Pr-Asn CPs large spheres; (b, d, f) Nd-Asn CPs large spheres.

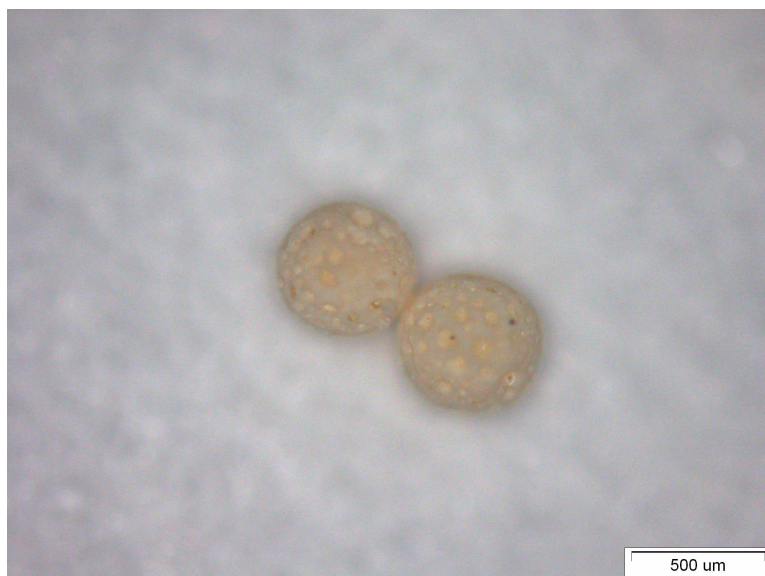

**Figure S2** The optical image of Ce-Asn CPs large spheres.

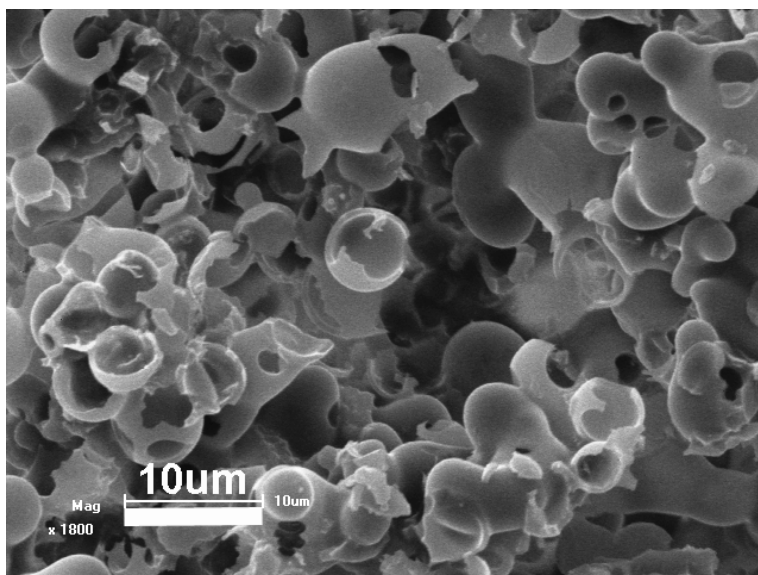

**Figure S3** SEM images of Ce-Asn CPs obtained at molar ratio of  $\text{Ce}^{3+}$ :asparagine= 0.15: 6 in pure water at 160 °C for 12 h, and the quantity of asparagine is 6 mmol.

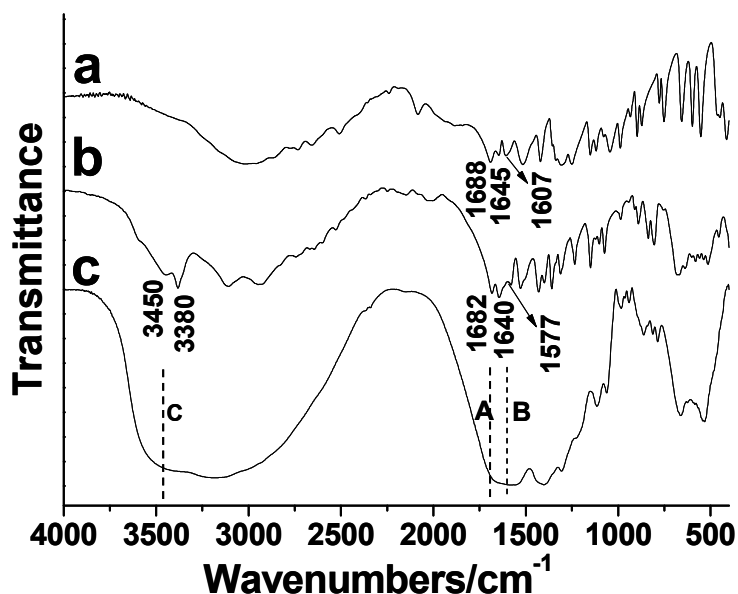

**Figure S4** FT-IR spectra of (a) L-aspartic acids; (b) L-asparagine; (c) Ce-Asn CPs large spheres. Band A, B and C pointed out by dash line centered at c. a.  $1680\text{ cm}^{-1}$ ,  $1580\text{ cm}^{-1}$  and  $3480\text{ cm}^{-1}$ .

**Table S1** Assignments of binds in the FT-IR spectra of L-asparagine and L-aspartic acid.

| Sample          | Bands in IR spectra/ $\text{cm}^{-1}$ | Assignment                                                                          |
|-----------------|---------------------------------------|-------------------------------------------------------------------------------------|
| L-aspartic acid | 1688                                  | C=O (-COOH) stretching                                                              |
|                 | 1645                                  | $\text{NH}_3^+$ (protonated $\alpha$ -amino) asymmetric deformation                 |
|                 | 1607                                  | $\text{COO}^-$ asymmetric stretching                                                |
| L-asparagine    | 3450, 3380                            | -OH (crystal water) stretching/<br>-NH <sub>2</sub> (CONH <sub>2</sub> ) stretching |
|                 | 1682                                  | C=O (-COOH) stretching                                                              |
|                 | 1640                                  | $\text{NH}_3^+$ (protonated $\alpha$ -amino) asymmetric deformation                 |
|                 | 1577                                  | $\text{COO}^-$ asymmetric stretching                                                |

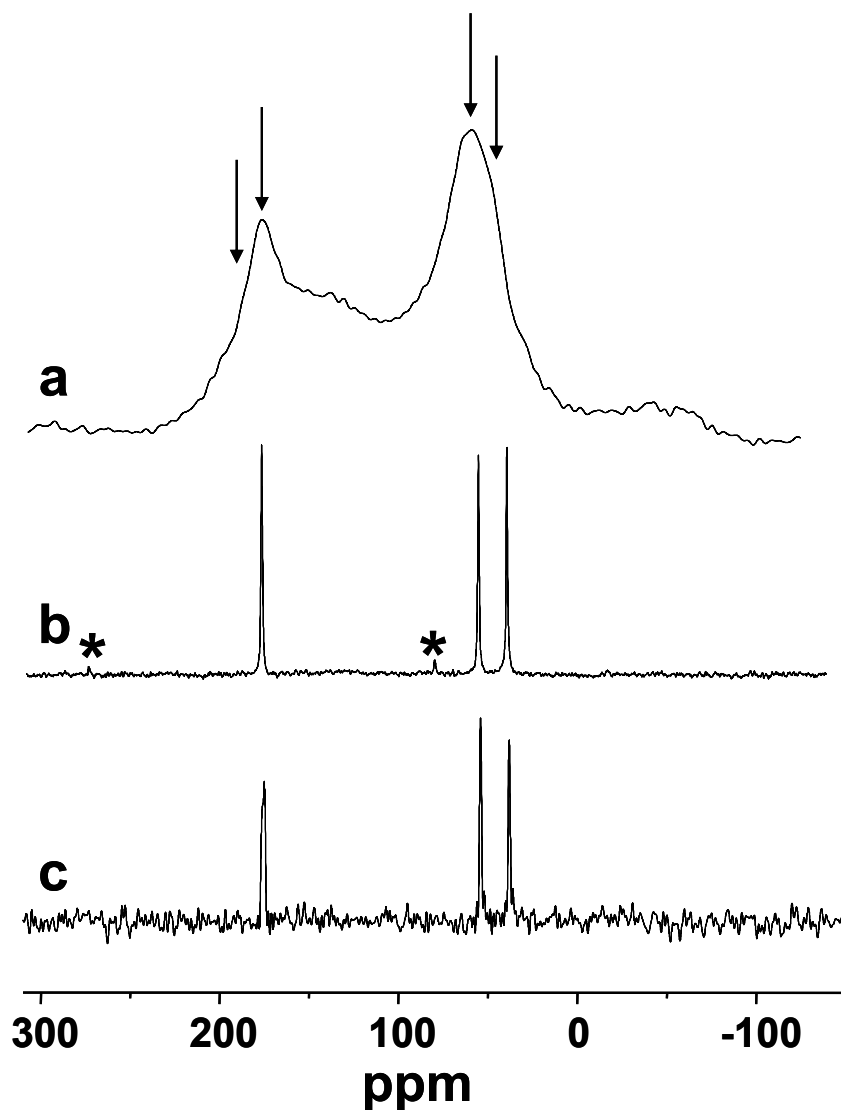

**Figure S5** Solid state  $^{13}\text{C}$  CP/MAS NMR spectra of (a) Ce-Asn CPs large spheres, the arrows pointed out four peaks at (left to right): shoulder signal at c.a. 185 ppm, 175 ppm, 53 ppm and 39 ppm; (b) L-asparagine; (c) L-aspartic acid. \*: spinning side bands.

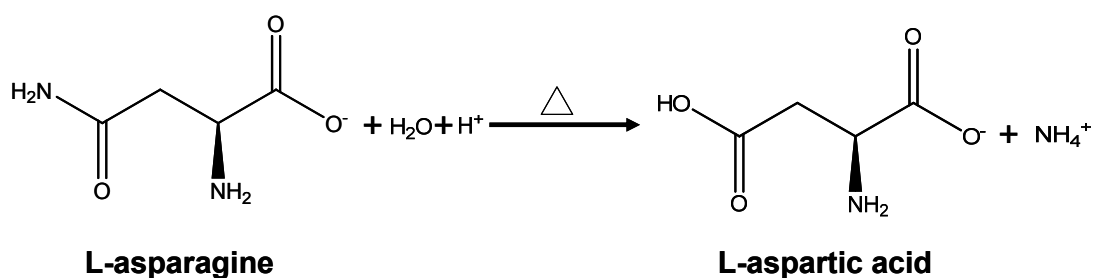

**Scheme S1** Transformation of L-asparagine to L-aspartic acid in our synthesis.

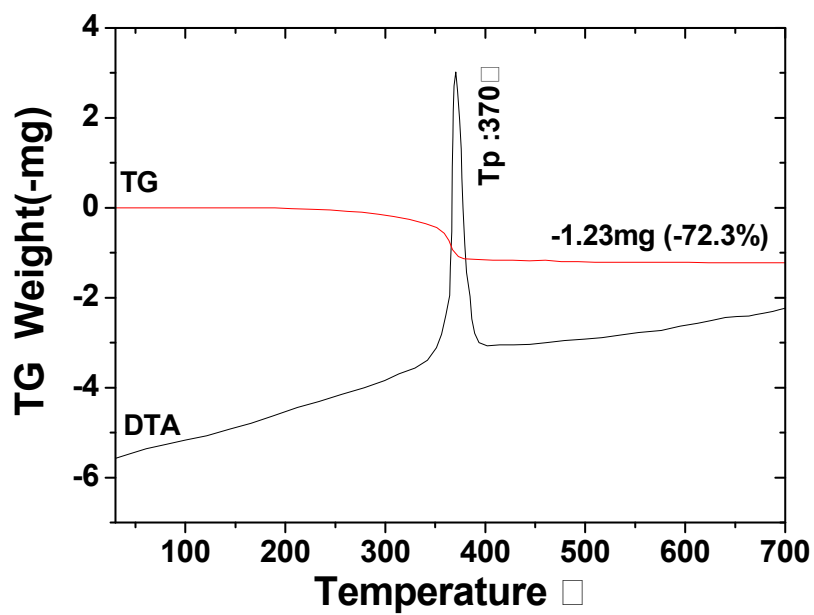

Figure S6 The TGA curve of Ce-Asn CPs large spheres.

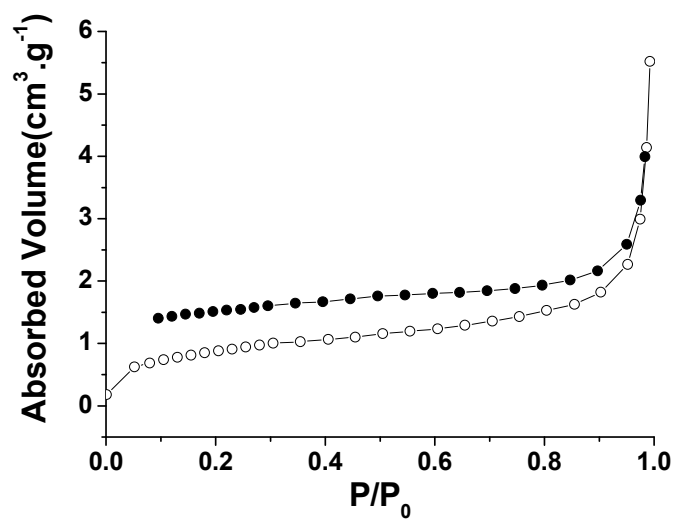

Figure S7  $\text{N}_2$  adsorption and desorption isotherms of Ce-Asn CPs large spheres.

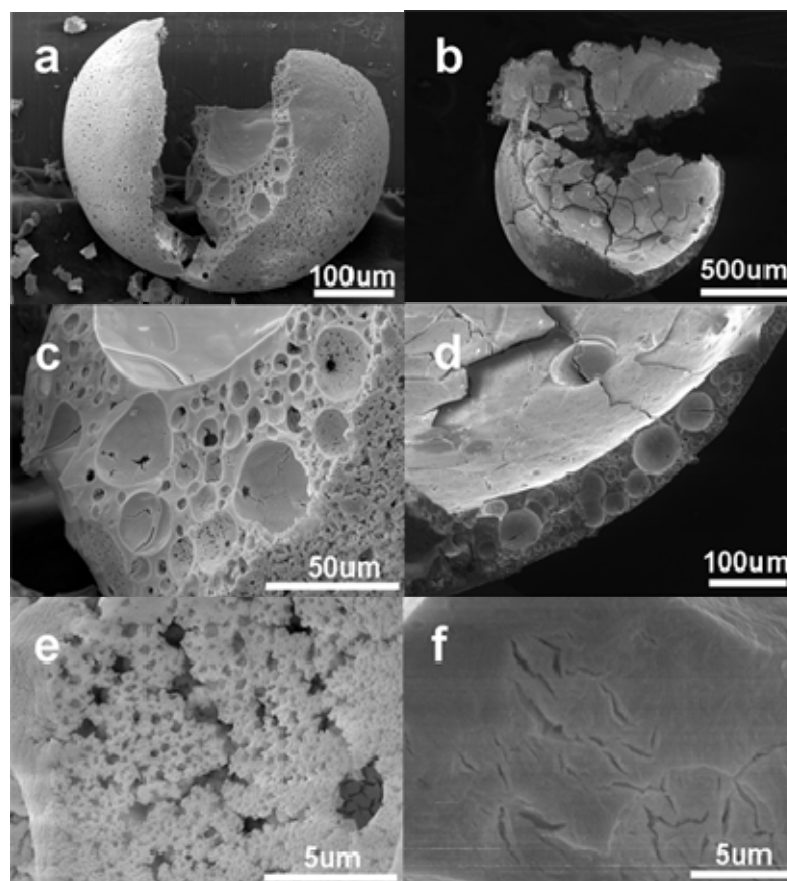

**Figure S8** SEM images of (a, c, e) ceria large spheres obtained by calcination of Ce-Asn CPs at 600 °C for 1.5 h. (b, d, f) lanthana hollow large spheres obtained by calcination of La-Asn CPs at 720 °C for 5 h.

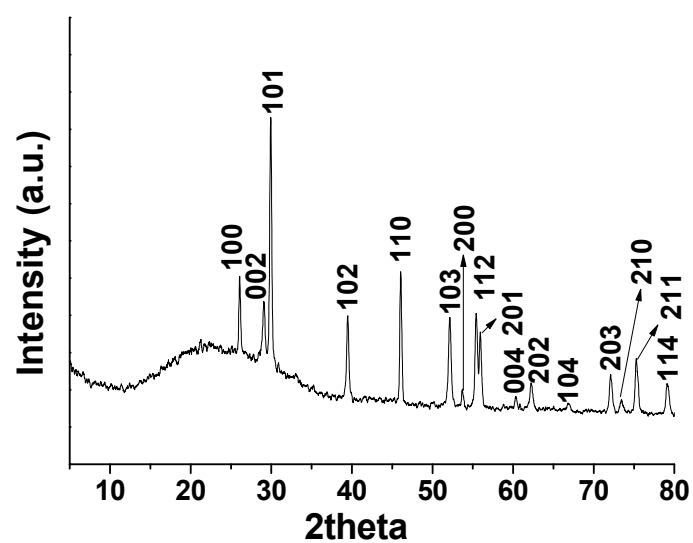

**Figure S9** The XRD pattern of lanthana large hollow spheres, the peaks were indexed according to the card of JCPDS No. 05-0602.

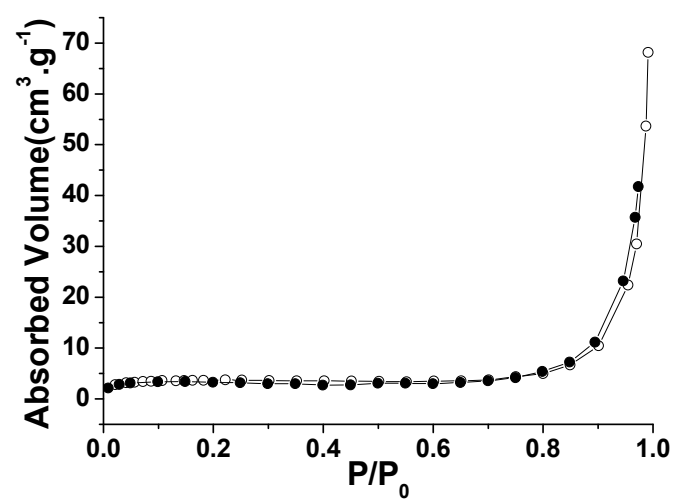

**Figure S10**  $\text{N}_2$  adsorption and desorption isotherms of lanthana large spheres.
